# Supplementary material for: Synthesis and biological evaluation of potential small moleculeinhibitors of tumor necrosis factor
Source: Royal Society of Chemistry journal article supplement (doi:10.1039/c5md00023h), 2015-01-01
Supplement: c5md00023h1.pdf [file c5md00023h1.pdf]

## Supplementary Information

### Synthesis and biological evaluation of potential small molecule inhibitors of Tumor Necrosis Factor

Christos Papaneophytou<sup>a,b</sup>, Polyxeni Alexiou<sup>c</sup>, Athanasios Papakyriakou<sup>d</sup>, Evangelos Ntougkos<sup>e</sup> Katerina Tsiliouka<sup>f</sup> Anna Maranti<sup>f</sup> Fotini Liepouri<sup>f</sup> Alexandros Strongilos<sup>f</sup> Anthi Mettou<sup>a,b</sup> Elias Couladouros<sup>c</sup> Elias Eliopoulos<sup>d</sup>, Eleni Douni<sup>d,e</sup>, George Kollias<sup>e</sup> and George Kontopidis<sup>a,b\*</sup>

<sup>a</sup> Veterinary School, University of Thessaly, Trikalon 224, Karditsa 43100, Greece

<sup>b</sup> Institute for Research and Technology of Thessaly (I.RE.TE.TH.), The Centre for Research & Technology Hellas (CE.R.TH.), Dimitriadou 95 & Paulou Mela, Volos 383 33, Greece

<sup>c</sup> Laboratory of General Chemistry, Department of Science, Agricultural University of Athens, Iera Odos 75, Athens 11855, Greece

<sup>d</sup> Laboratory of Genetics, Department of Biotechnology, Agricultural University of Athens, Iera Odos 75, Athens 11855, Greece

<sup>e</sup> Biomedical Sciences Research Center “Alexander Fleming”, Vari, Greece

<sup>f</sup> pro-ACTINA S.A., Archimidous Str. 59, P.O.Box 205, Koropi, Athens 19400, Greece

#### Table of contents

|                 |   |
|-----------------|---|
| Figure S1 ..... | 2 |
| Figure S2 ..... | 3 |
| Table S1.....   | 4 |

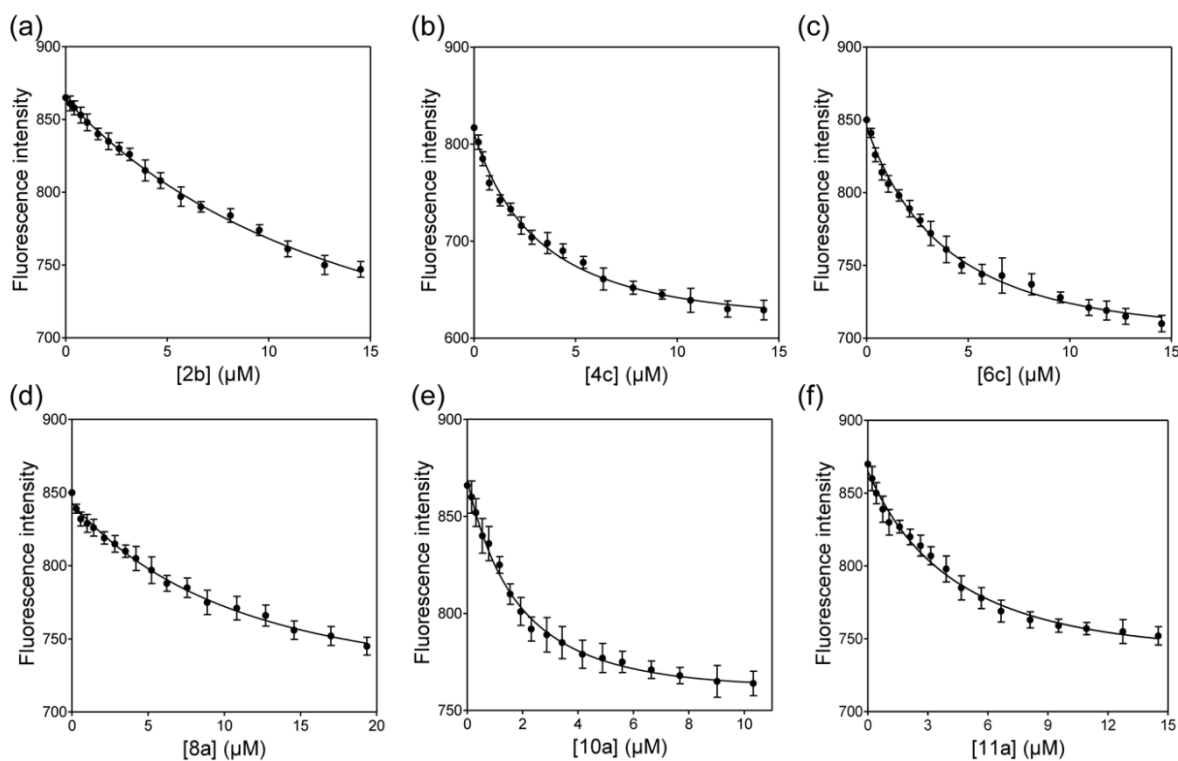

**Figure S1.** Examples of dissociation constant ( $K_d$ ) determination of TNF with some of the novel synthesized SPD-304 analogs. Representative plots obtained by monitoring the changes of fluorescence intensity of TNF by increasing the concentration of the compounds **2b** (a); **4c** (b); **6c** (c); **8a** (d); **10a** (e) and **11a** (f) respectively. In each case data were corrected using a blank sample containing tyrosine with the same fluorescence signal. Experiments were performed in 10 mM citrate-phosphate (pH 6.5) containing 5% DMSO. Dissociation constant was calculated by fitting the fluorescence intensity values to a quadratic equation. The mean values of three independent measurements are presented

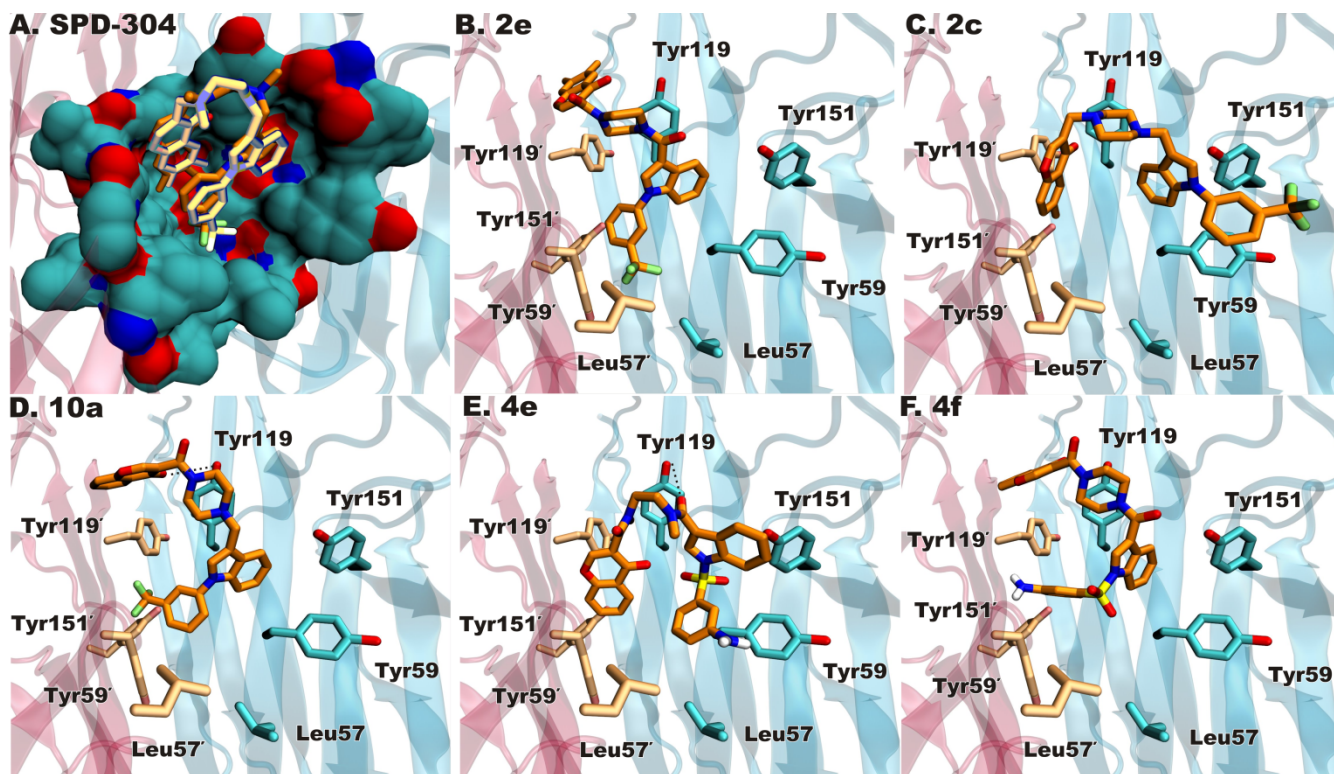

**Figure S2.** Predicted conformations of the most active compounds in comparison with SPD-304 shown at exactly the same orientation. (A) Surface representation of the SPD-304 binding pocket with the x-ray (yellow carbon atoms) and the best-matched (orange carbon atoms) conformations of the inhibitor. Predicted conformations of the most active compounds **2e** (B), **2c** (C), **10a** (D), **4e** (E), and **4f** (F) showing the major interacting residues of the SPD-304 binding site that are colored with bright orange or cyan carbons for each TNF monomer, respectively. All other atoms are colored with blue for nitrogen, red for oxygen and green for fluorine.

**Table S1.** Results of the docking calculations for the most active analogs in comparison with SPD-304. The most populated conformational cluster with the lowest estimated free energy of binding is designated as top-ranked, whereas the best-matched cluster is the one that resembles more closely the crystallographic pose of SPD-304. The estimated free energy of binding  $\Delta G$  (Kcal/mol) is the mean value of each conformational ensemble that was clustered with a RMSD cutoff of 2.0 Å and its population is given as percent. The experimental dissociation constant is designated as  $K_d^{\text{exp}}$ , whereas  $K_d^{\text{est}}$  was estimated using the equation:  $\Delta G = R \cdot T \cdot \ln K_d$  where  $R = 1.9872 \text{ cal} \cdot \text{K}^{-1} \cdot \text{mol}^{-1}$  and  $T = 298.15 \text{ K}$ .

| Compound                | Top-ranked cluster |             |                          |                                         | Best-matched cluster |             |                          |                                         | $K_d^{\text{exp}}$<br>( $\mu\text{M}$ ) |
|-------------------------|--------------------|-------------|--------------------------|-----------------------------------------|----------------------|-------------|--------------------------|-----------------------------------------|-----------------------------------------|
|                         | Rank               | Pop.<br>(%) | $\Delta G$<br>(Kcal/mol) | $K_d^{\text{est}}$<br>( $\mu\text{M}$ ) | Rank                 | Pop.<br>(%) | $\Delta G$<br>(Kcal/mol) | $K_d^{\text{est}}$<br>( $\mu\text{M}$ ) |                                         |
| SPD-304 <sup>xray</sup> | 7                  | 36          | -7.39                    | 3.8                                     | 23                   | 1           | -6.85                    | 9.5                                     | 5.4                                     |
| SPD-304                 | 2                  | 21          | -7.31                    | 4.4                                     | 12                   | 3           | -7.13                    | 5.9                                     | 5.4                                     |
| 2c                      | 1                  | 21          | -8.52                    | 0.57                                    | 15                   | 1           | -7.58                    | 2.8                                     | 4.8                                     |
| 10e                     | 2                  | 38          | -8.42                    | 0.67                                    | 5                    | 2           | -7.83                    | 1.8                                     | 2.1                                     |
| 10a                     | 1                  | 45          | -9.28                    | 0.16                                    | 5                    | 1           | -8.04                    | 1.3                                     | 1.6                                     |
| 11a                     | 1                  | 20          | -8.94                    | 0.28                                    | 14                   | 2           | -7.72                    | 2.2                                     | 5.2                                     |
| 2d                      | 3                  | 9           | -8.32                    | 0.80                                    | 16                   | 1           | -8.15                    | 1.1                                     | 2.5                                     |
| 2e                      | 4                  | 52          | -9.70                    | 0.08                                    | 4                    | 3           | -8.54                    | 0.55                                    | 5.1                                     |
| 8c                      | 1                  | 54          | -9.63                    | 0.09                                    | 5                    | 2           | -8.86                    | 0.32                                    | 0.74                                    |
| 4c                      | 1                  | 16          | -9.87                    | 0.06                                    | 22                   | 2           | -8.24                    | 0.91                                    | 3.2                                     |
| 4e                      | 1                  | 22          | -8.85                    | 0.33                                    | 30                   | 1           | -7.84                    | 1.8                                     | 0.96                                    |
| 4f                      | 2                  | 43          | -9.33                    | 0.14                                    | 7                    | 4           | -8.51                    | 0.57                                    | 5.4                                     |
| 8c                      | 1                  | 54          | -9.63                    | 0.09                                    | 5                    | 2           | -8.86                    | 0.32                                    | 0.74                                    |

SPD-304<sup>xray</sup> refers to the results reported in ref<sup>[17]</sup> by using the crystallographic coordinates of the inhibitor and a larger search space with respect to this study (SPD-304).
